# Supplementary material for: Forecasting carbon monoxide on a global scale for the ATom-1 aircraft mission: insights from airborne and satellite observations and modeling
Source: Copernicus journal article supplement (doi:10.5194/acp-18-10955-2018), 2018-08-06
Supplement: Supplementary file 1 [file acp-18-10955-2018-supplement.pdf]

Supplement of Atmos. Chem. Phys., 18, 10955–10971, 2018  
<https://doi.org/10.5194/acp-18-10955-2018-supplement>  
© Author(s) 2018. This work is distributed under  
the Creative Commons Attribution 4.0 License.

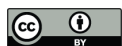

*Supplement of*

## **Forecasting carbon monoxide on a global scale for the ATom-1 aircraft mission: insights from airborne and satellite observations and modeling**

**Sarah A. Strode et al.**

*Correspondence to:* Sarah A. Strode ([sarah.a.strode@nasa.gov](mailto:sarah.a.strode@nasa.gov))

The copyright of individual parts of the supplement might differ from the CC BY 4.0 License.

1 **Table S1: Tagged tracer contributions (ppbv) to CO from GEOS-5 averaged over each ATom-1 Flight. The**  
 2 **columns represent total CO (totCO), other BB (bbot), N. American BB (bbna), S. American BB (bbsa), African**  
 3 **bb (bbaf), Eurasian BB (bbea), other non-BB (nbot), Asian non-BB (nbas), N. American non-BB (nbna), and**  
 4 **European non-BB (nbeu).**

5

| <b>flight</b> | <b>totCO</b> | <b>bbot</b> | <b>bbna</b> | <b>bbsa</b> | <b>bbaf</b> | <b>bbea</b> | <b>nbot</b> | <b>nbas</b> | <b>nbna</b> | <b>nbeu</b> |
|---------------|--------------|-------------|-------------|-------------|-------------|-------------|-------------|-------------|-------------|-------------|
| 1             | 77.3         | 0.910       | 2.50        | 1.08        | 4.66        | 0.722       | 42.7        | 8.38        | 14.6        | 1.79        |
| 2             | 87.7         | 1.79        | 1.74        | 0.506       | 1.29        | 8.61        | 23.7        | 29.1        | 11.4        | 9.54        |
| 3             | 81.1         | 1.89        | 0.712       | 0.504       | 1.49        | 4.29        | 29.9        | 31.4        | 5.76        | 5.12        |
| 4             | 63.1         | 1.34        | 0.368       | 1.20        | 4.45        | 0.644       | 41.5        | 9.43        | 2.66        | 1.42        |
| 5             | 57.0         | 1.52        | 0.162       | 2.04        | 4.88        | 0.189       | 40.4        | 5.79        | 1.12        | 0.768       |
| 6             | 54.2         | 1.59        | 0.134       | 2.15        | 4.18        | 0.112       | 40.7        | 3.86        | 0.864       | 0.594       |
| 7             | 71.0         | 1.54        | 0.199       | 4.24        | 12.0        | 0.284       | 43.8        | 6.33        | 1.47        | 1.11        |
| 8             | 103          | 1.18        | 1.12        | 1.21        | 21.8        | 2.28        | 45.7        | 13.2        | 12.3        | 4.12        |
| 9             | 86.6         | 1.34        | 2.68        | 0.397       | 1.46        | 7.19        | 24.0        | 21.9        | 19.1        | 8.63        |
| 10            | 91.2         | 1.37        | 2.85        | 0.367       | 1.21        | 5.80        | 23.7        | 25.4        | 23.0        | 7.64        |
| 11            | 107          | 1.14        | 18.6        | 0.678       | 2.44        | 2.09        | 31.7        | 21.7        | 25.7        | 3.34        |

6

7

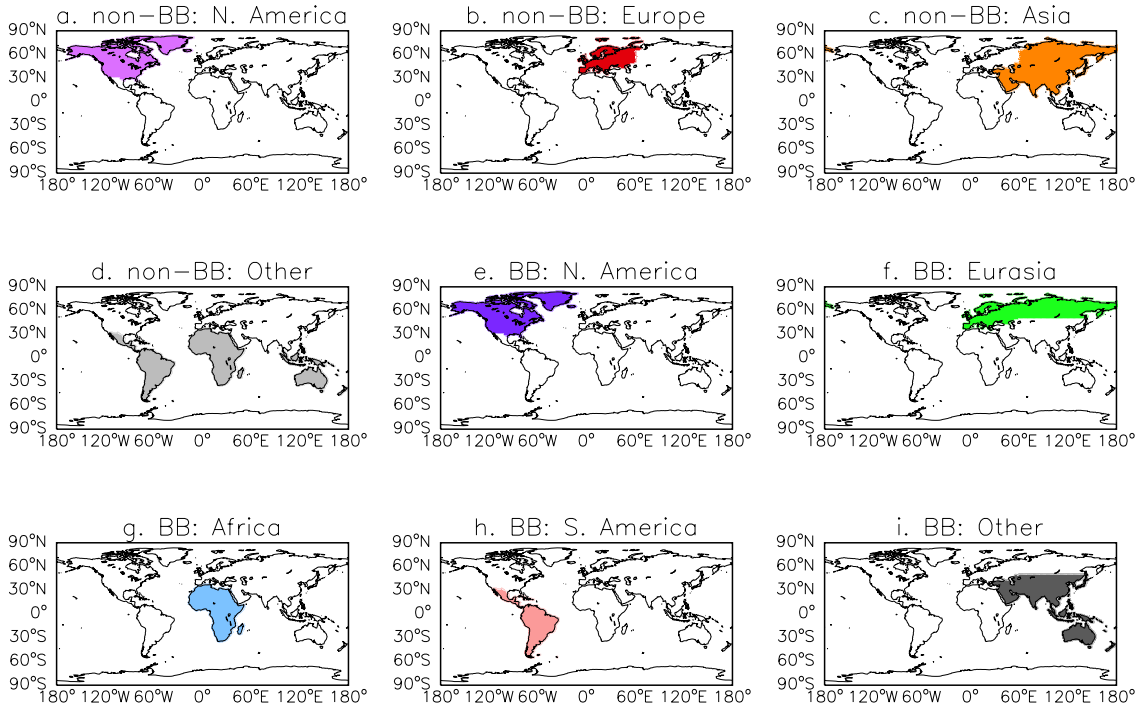

8

9 **Fig. S1: The regions corresponding to each tagged-CO tracer**

10

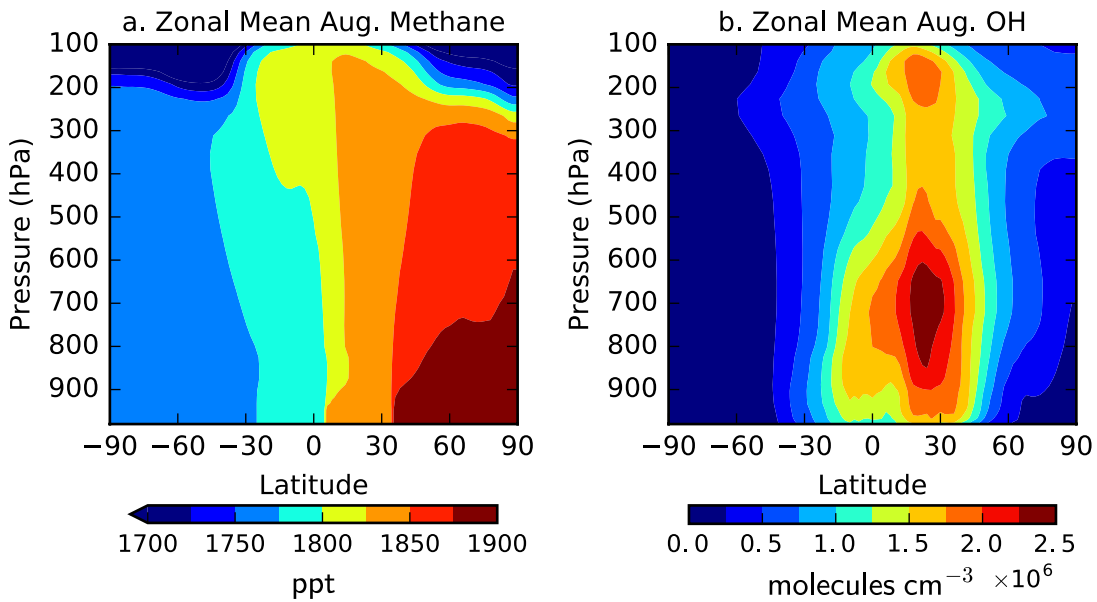

11

12 **Fig. S2: The August zonal mean (a) methane concentrations and (b) OH concentrations used in the GEOS-5 FP**  
 13 **CO simulation.**

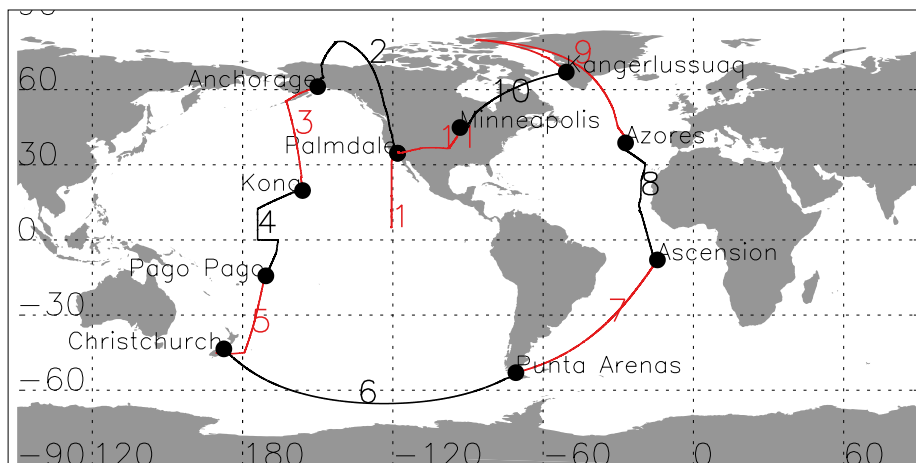

14  
15  
16

Fig. S3: The ATom-1 flight tracks. Labeled circles indicate the starting and ending points of each flight.

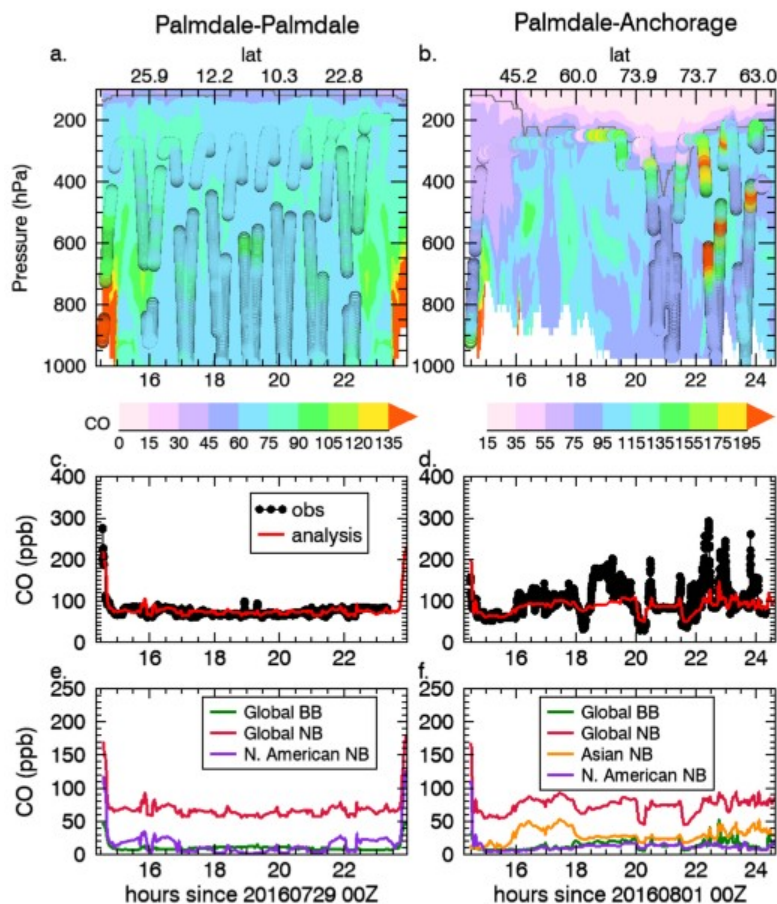

17  
18  
19  
20  
21

Fig. S4: Curtain plot of CO (ppb) from the GEOS-5 analysis as a function of time and pressure overlapped with QCLS CO observations (top row) for the a) Palm Dale to Palm Dale flight and b) Palm Dale to Anchorage flight. The top x-axis indicates the latitudes of the flight track. c-d) The GEOS-5 CO interpolated to the flight track (red line) is compared to the observations (black circles). e-f) Tagged tracer contributions to the GEOS-5 CO.

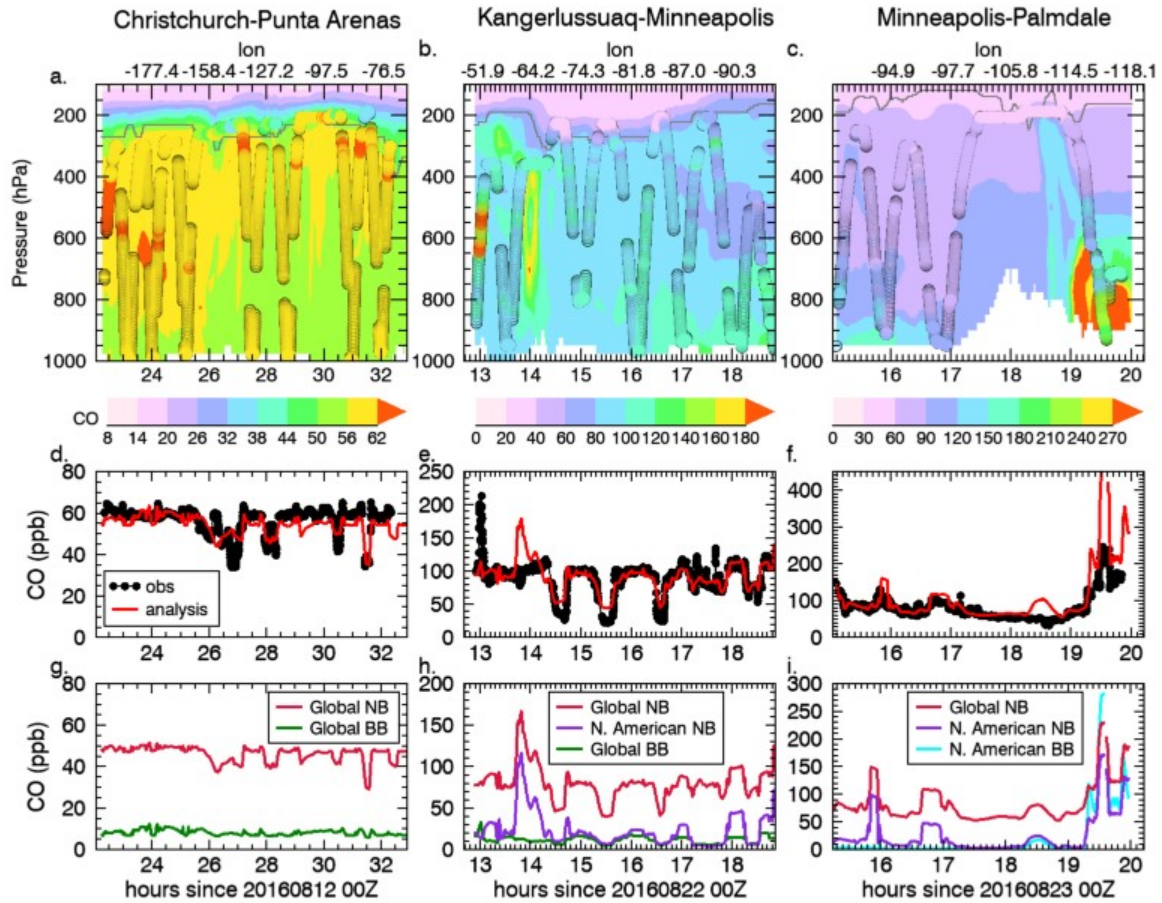

22

23 Fig. S5: Curtain plot of CO (ppb) from the GEOS-5 analysis as a function of time and pressure overplotted with  
 24 QCLS CO observations (top row) for the a) Christchurch to Punta Arenas flight, b) Kangerlussuaq to Minneapolis  
 25 flight, and c) Minneapolis to Palmdale flight. Axis ranges vary between panels due to the large range of  
 26 concentrations encountered. The top x-axis indicates the longitudes of the flight track. d-f) The GEOS-5 CO  
 27 interpolated to the flight track (red line) is compared to the observations (black circles). g-h) Tagged tracer  
 28 contributions to the GEOS-5 CO.

29

a. CO, 2016-08-20T06 UTC (30-hr fcst)

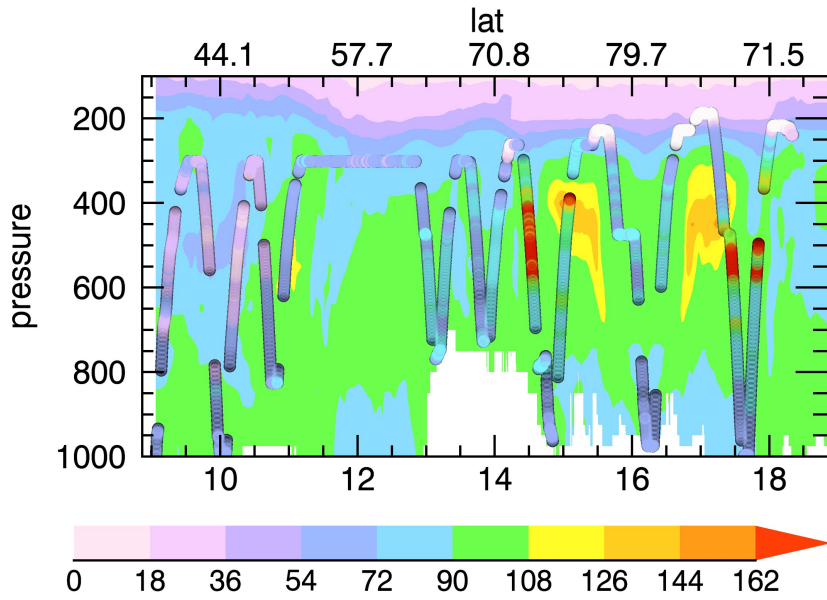

b. CO, 2016-08-20T12 UTC (36-hr fcst)

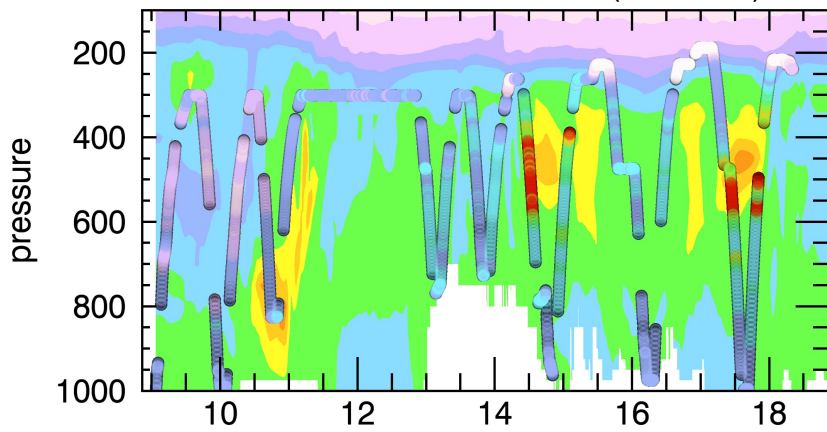

c. CO 2016-08-20

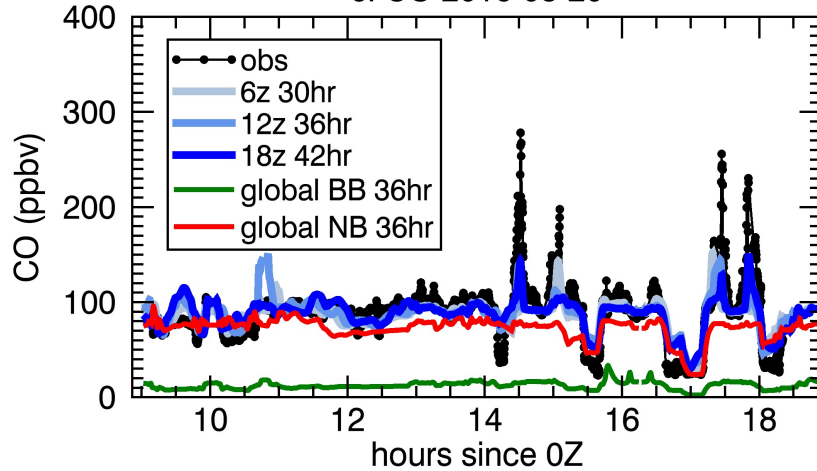

31 **Figure S6: Color contours of the GEOS-5 forecasted CO along the flight path of RF09 from Azores to**  
32 **Kangerlussuaq. The 30-hr forecast at 2016-08-20T6:00 (top) is compared with the 36-hr forecast (2016-08-**  
33 **20T12:00, middle). The ATom CO observations (circles) are pasted on both of these forecasts. (Bottom) time**  
34 **series of observed (black) and forecasted CO (blue) at different snap shot times (2016-08-20T6:00, 2016-08-**  
35 **20T12:00, 2016-08-20T18:00). It also shows the CO from global non-BB emissions (NB, red) and global biomass**  
36 **burning emissions (green).**

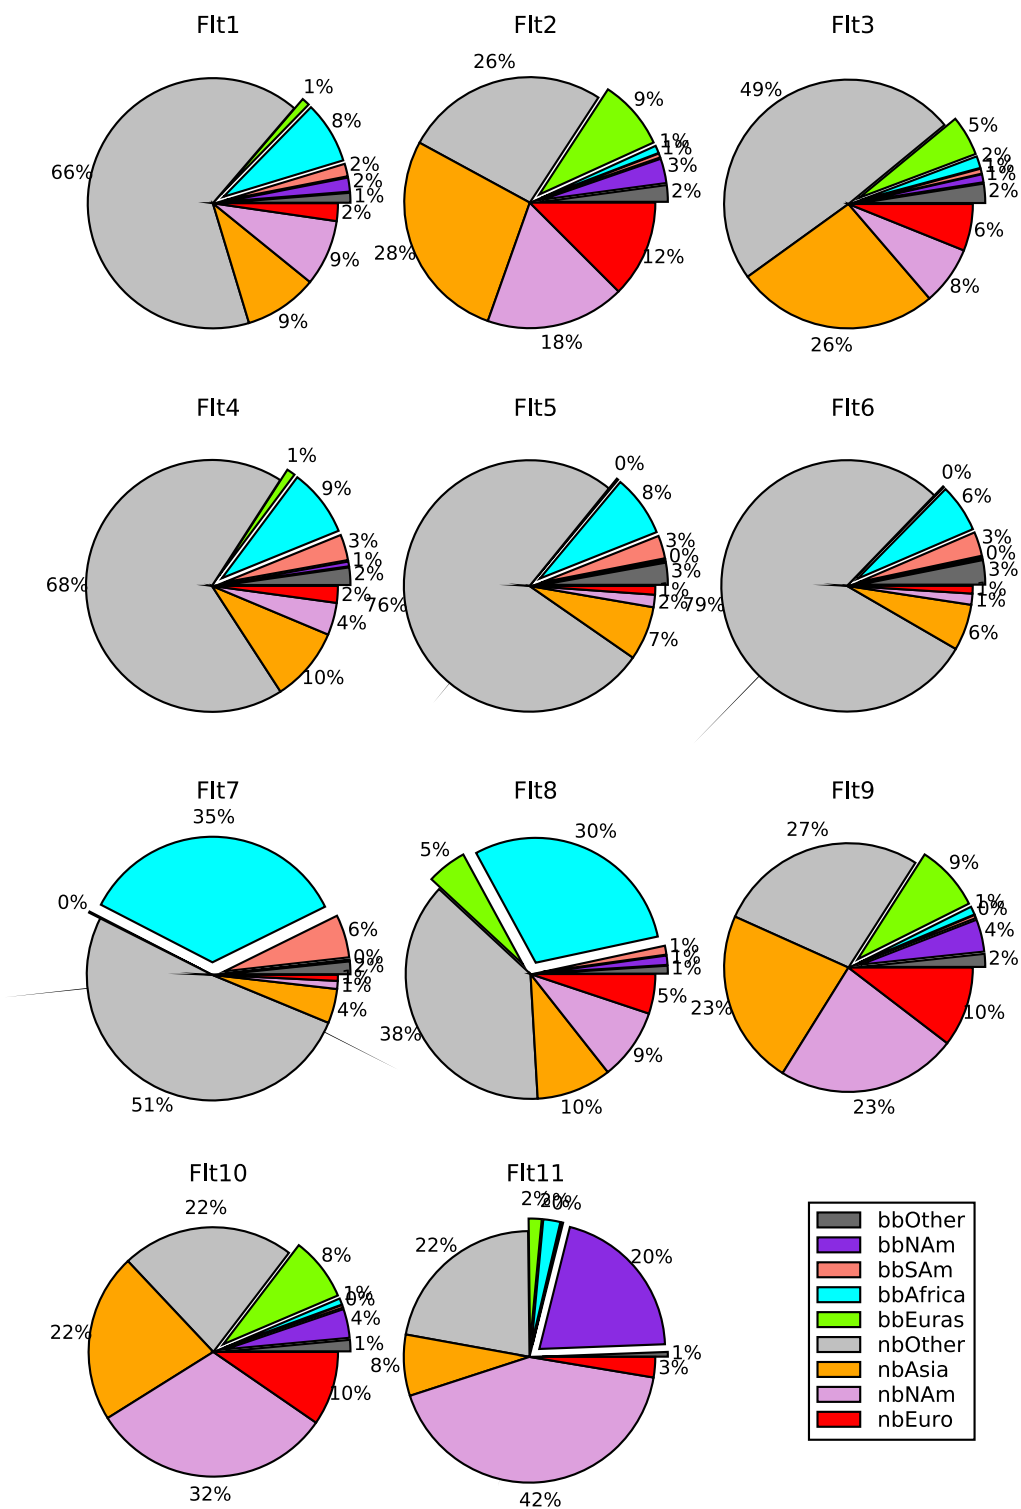

37

38 Fig. S7: Percent contributions of tagged tracers to total CO in the lower troposphere for each flight. Exploded  
 39 slices represent the biomass burning tracers: North American (purple), S. American (salmon), African (cyan),



40 Eurasian (green), and Other (dark gray). The non-biomass burning (nb) tracers are for Asia (orange), N. America  
41 (lavender), Europe (red), and other (light gray).
